# Supplementary material for: Experimental and Theoretical Study of N2 Adsorption on Hydrogenated Y2C4H− and Dehydrogenated Y2C4− Cluster Anions at Room Temperature
Source: MDPI journal article supplement (doi:10.3390/ijms23136976), 2022-06-23
Supplement: s1 [file s1]

# Supplementary Information for

## Experimental and Theoretical Study of N<sub>2</sub> Adsorption on Hydrogenated Y<sub>2</sub>C<sub>4</sub>H<sup>-</sup> and Dehydrogenated Y<sub>2</sub>C<sub>4</sub><sup>-</sup> Cluster Anions at Room Temperature

Min Gao, Yong-Qi Ding and Jia-Bi Ma \*

Key Laboratory of Cluster Science of Ministry of Education, Beijing Key Laboratory of Photoelectronic/Electrophotonic Conversion Materials, School of Chemistry and Chemical Engineering, Beijing Institute of Technology, Beijing 102488, China

\* Correspondence: [majiabi@bit.edu.cn](mailto:majiabi@bit.edu.cn)

### Contents:

1. Additional time-of-flight (TOF) mass spectra. (Pages S2, S3)
2. Additional density functional theory results. (Pages S5-S16)
3. References. (Page S17)

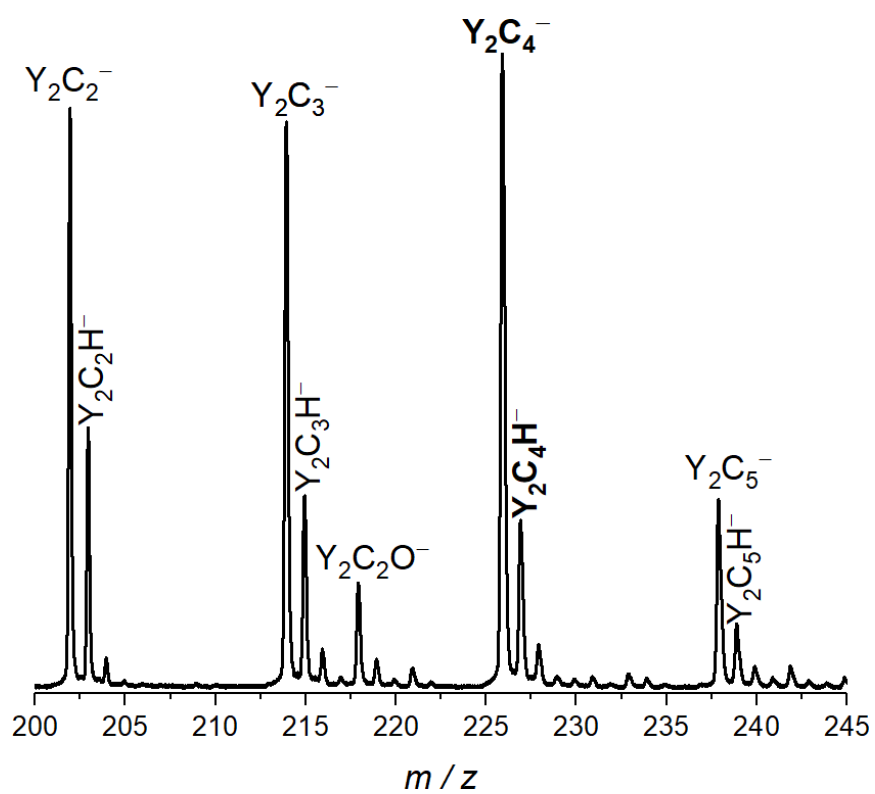

**Figure S1.** The mass spectra for the generation of  $Y_2C_4H_{0,1}^-$ .

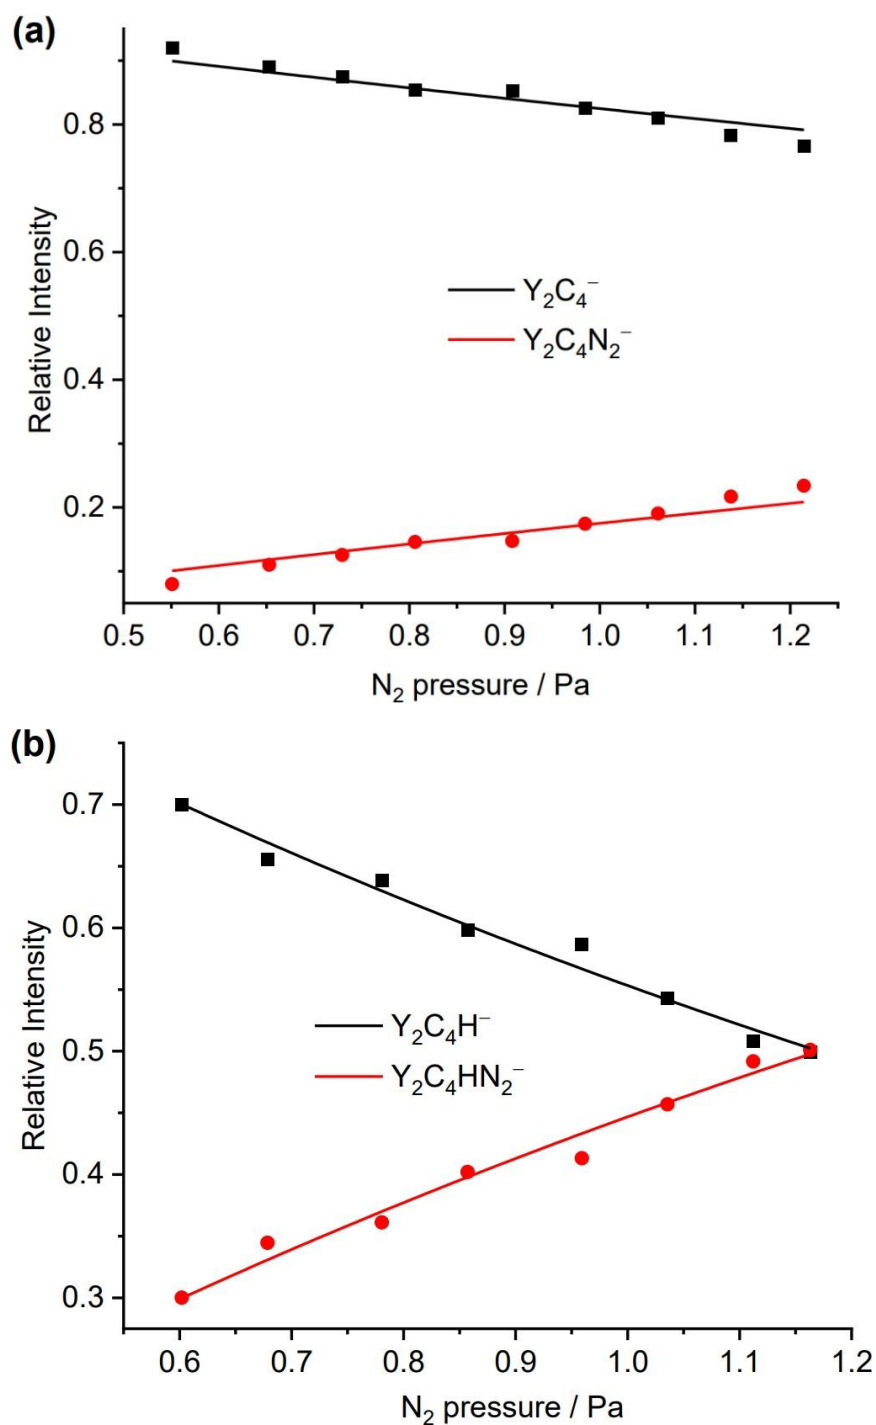

**Figure S2.** Variations of the relative ion intensities with respect to the  $N_2$  pressures in the reactions of (a)  $Y_2C_4^-$  and  $N_2$  for 6 ms, as well as (b)  $Y_2C_4H^-$  and  $N_2$  for 14 ms, respectively. The solid lines are fitted to the experimental data points by using the equations derived with the approximation of the pseudo-first-order reaction mechanism.

The Rice–Ramsperger–Kassel–Marcus theory (RRKM)<sup>33</sup> was used to calculate the rate constant of traversing transition states from intermediates. For these calculations, the energy ( $E$ ) of the reaction intermediate and the energy barrier ( $E^\ddagger$ ) for each step were needed. The reaction intermediate possesses the vibrational energies ( $E_{\text{vib}}$ ) of  $\text{Y}_2\text{C}_4\text{H}_{0,1}^-$  and  $\text{N}_2$ , the center of mass kinetic energy ( $E_k$ ), and the binding energy ( $E_b$ ) which is the energy difference between the separated reactants ( $\text{Y}_2\text{C}_4\text{H}_{0,1}^- + \text{N}_2$ ) and the reaction complexes. The values of  $E_{\text{vib}}$  and  $E_b$  were taken from the DFT calculations and  $E_k = \mu v^2/2$ , in which  $\mu$  is the reduced mass and  $v$  is the velocity. The densities and the numbers of states required for RRKM calculations were obtained by the direct count method<sup>51</sup> with the DFT calculated vibrational frequencies under the approximation of harmonic vibrations. According to the DFT calculated energies, the rates of internal conversion ( $k_{\text{conversion}}$ ) for processes of **I2**  $\rightarrow$  **TS2** in Reaction (a) and **I4**  $\rightarrow$  **TS4** in Reaction (b) are  $2.65 \times 10^{10} \text{ s}^{-1}$  and  $8.49 \times 10^{11} \text{ s}^{-1}$ , respectively.

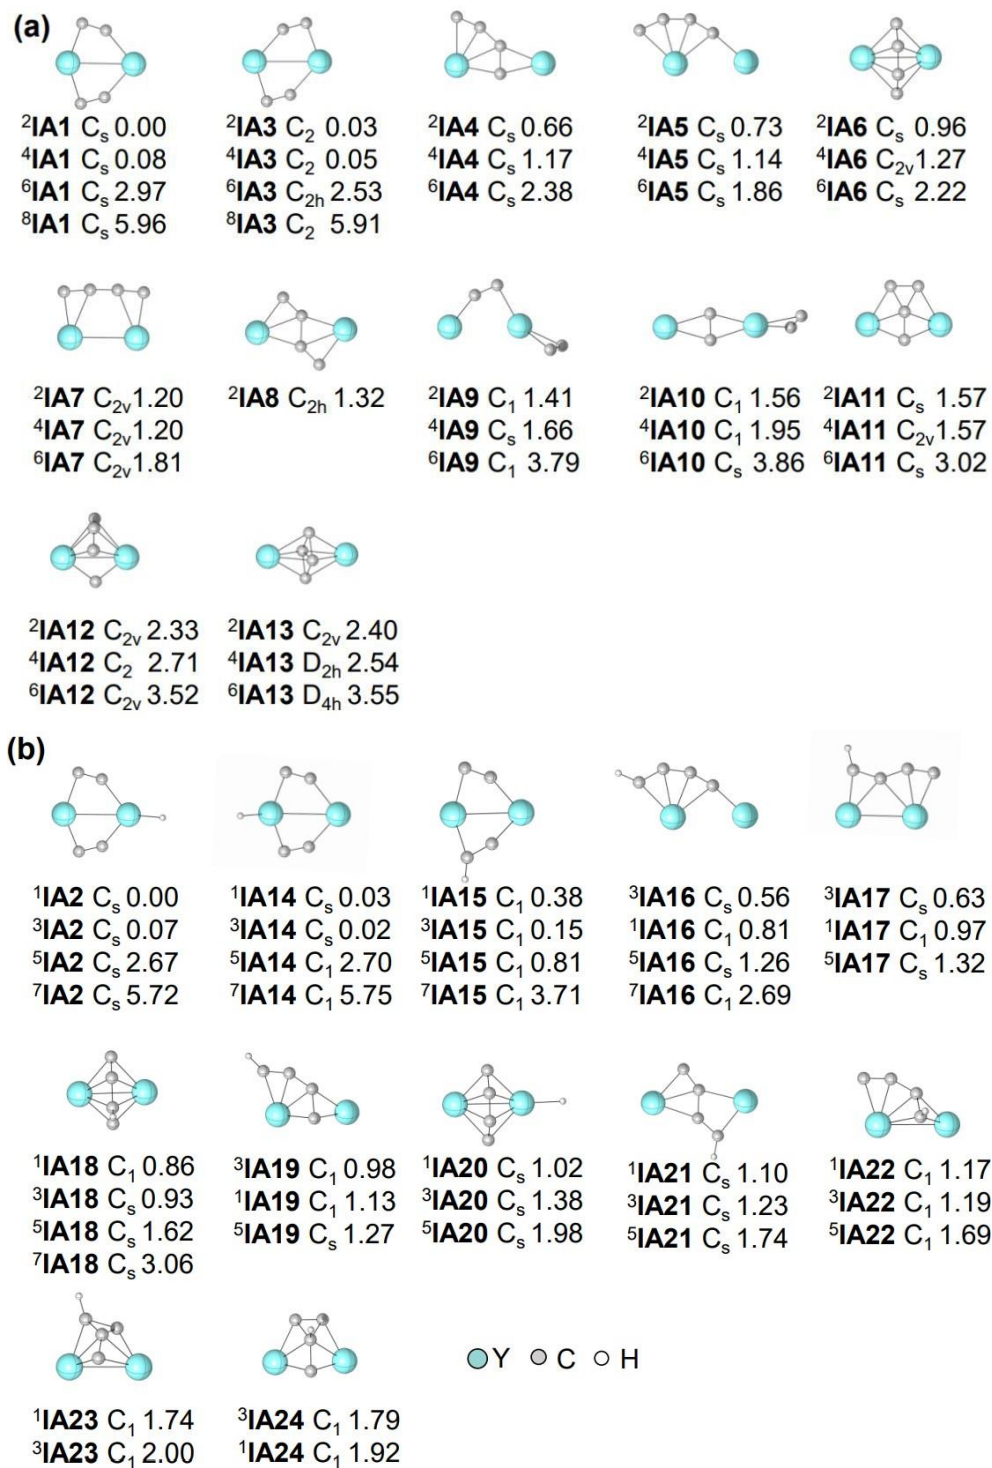

**Figure S3.** DFT-calculated structures and relative energies of  $\text{Y}_2\text{C}_4\text{H}_{0,1}^-$ . The point group and electronic state are given under each structure. Superscripts indicate the spin multiplicities. The zero-point vibration corrected energies ( $\Delta H_{0K}$  in eV) of each structure are given.

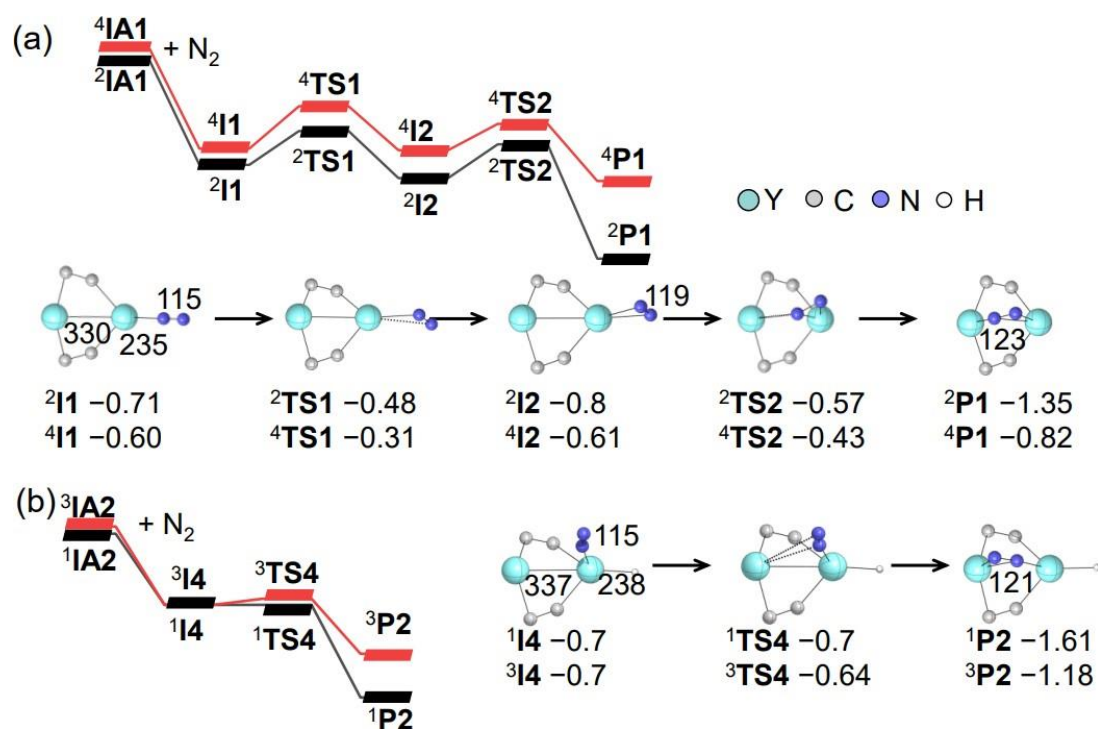

**Figure S4.** BPW91-D3-calculated potential energy surfaces for the reactions of (a)  $\text{Y}_2\text{C}_4^-$  and (b)  $\text{Y}_2\text{C}_4\text{H}^-$  with  $\text{N}_2$ . The spin multiplicities of (a) are doublet and quartet. The spin multiplicities of (b) are singlet and triplet. Single-point energy calculations by DFT were performed to determine the relative energies (in eV) of the intermediates, transition states, and products with respect to the separate reactants.

**Table S1.** Enthalpy and Gibbs free energies along with electronic and zero-point correction energies. Energies in eV are given.

| structure                       | Enthalpy (eV) | Gibbs free energies (eV) | EE + Zero-point Energy(eV) |
|---------------------------------|---------------|--------------------------|----------------------------|
| <sup>2</sup> IA1+N <sub>2</sub> | 0             | 0                        | 0                          |
| <sup>2</sup> I1                 | -0.71         | -0.34                    | -0.71                      |
| <sup>2</sup> TS1                | -0.49         | -0.12                    | -0.48                      |
| <sup>2</sup> I2                 | -0.81         | -0.42                    | -0.8                       |
| <sup>2</sup> TS2                | -0.60         | -0.13                    | -0.57                      |
| <sup>2</sup> P1                 | -1.39         | -0.89                    | -1.35                      |
| <sup>4</sup> IA1+N <sub>2</sub> | 0.08          | 0.07                     | 0.08                       |
| <sup>4</sup> I1                 | -0.60         | -0.27                    | -0.6                       |
| <sup>4</sup> TS1                | -0.33         | 0.03                     | -0.31                      |
| <sup>4</sup> I2                 | -0.62         | -0.26                    | -0.61                      |
| <sup>4</sup> TS2                | -0.46         | -0.01                    | -0.43                      |
| <sup>4</sup> P1                 | -0.85         | -0.40                    | -0.82                      |

| structure                       | Enthalpy (eV) | Gibbs free energies (eV) | EE + Zero-point Energy(eV) |
|---------------------------------|---------------|--------------------------|----------------------------|
| <sup>1</sup> IA2+N <sub>2</sub> | 0             | 0                        | 0                          |
| <sup>1</sup> I4                 | -0.72         | -0.31                    | -0.70                      |
| <sup>1</sup> TS4                | -0.74         | -0.26                    | -0.70                      |
| <sup>1</sup> P2                 | -1.66         | -1.14                    | -1.61                      |
| <sup>3</sup> IA1+N <sub>2</sub> | 0.07          | 0.049                    | 0.07                       |
| <sup>3</sup> I4                 | -0.70         | -0.38                    | -0.70                      |
| <sup>3</sup> TS4                | -0.66         | -0.27                    | -0.64                      |
| <sup>3</sup> P2                 | -1.22         | -0.74                    | -1.18                      |
| <sup>1</sup> I6                 | -0.46         | -0.09                    | -0.45                      |
| <sup>1</sup> TS6                | -0.26         | 0.15                     | -0.24                      |
| <sup>1</sup> I7                 | -0.59         | -0.19                    | -0.58                      |
| <sup>1</sup> TS7                | -0.39         | 0.055                    | -0.37                      |

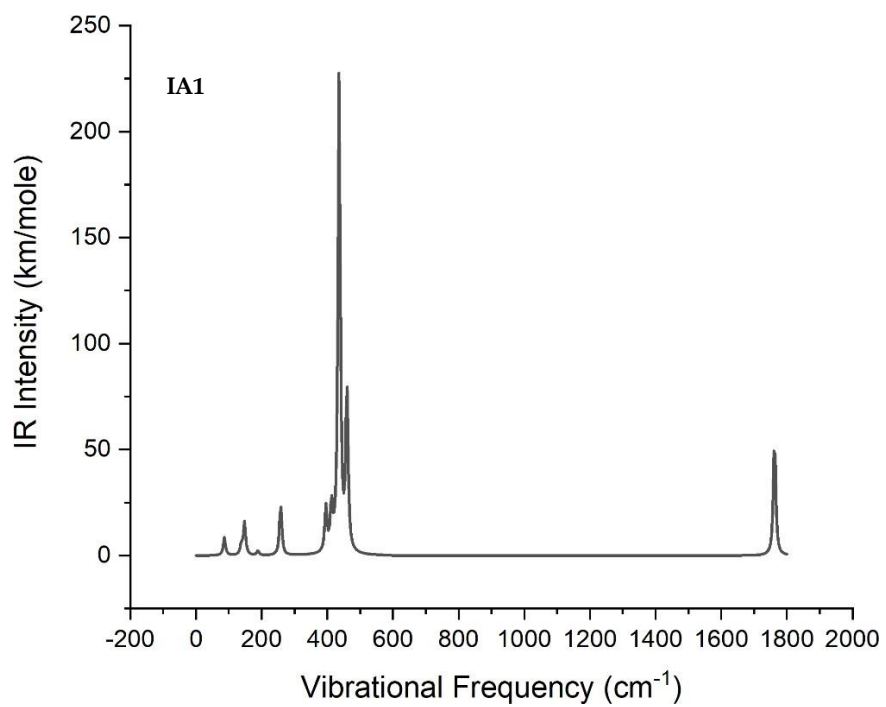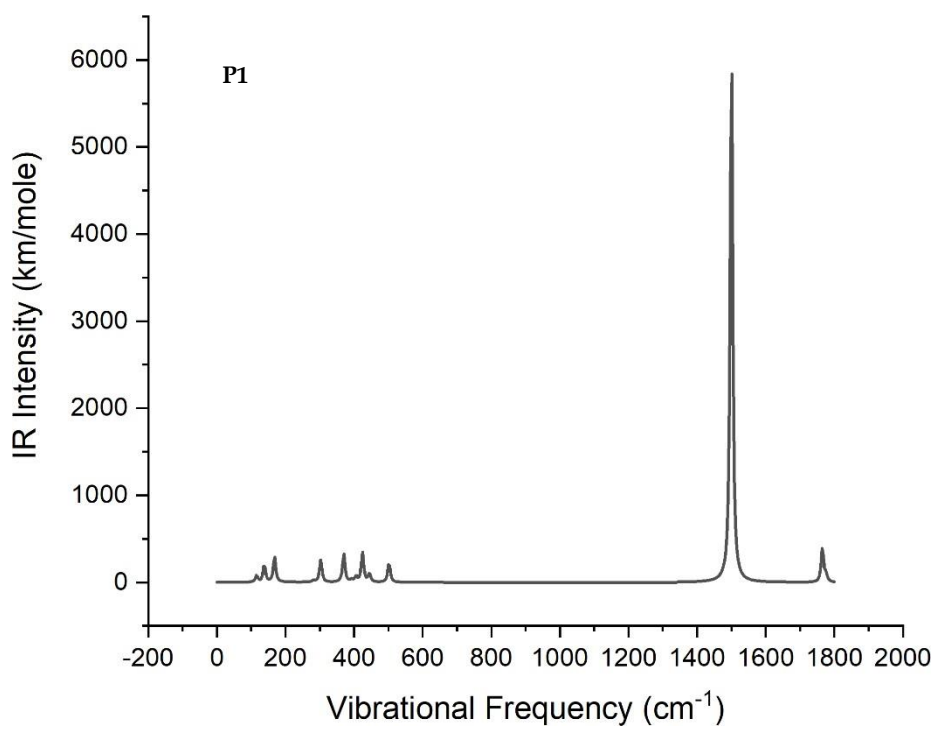



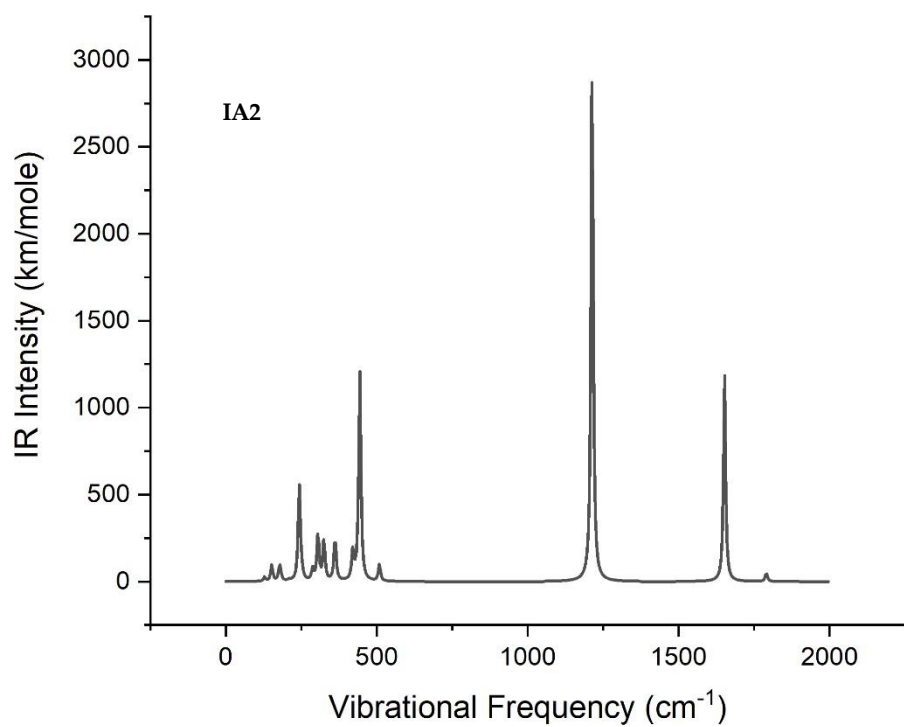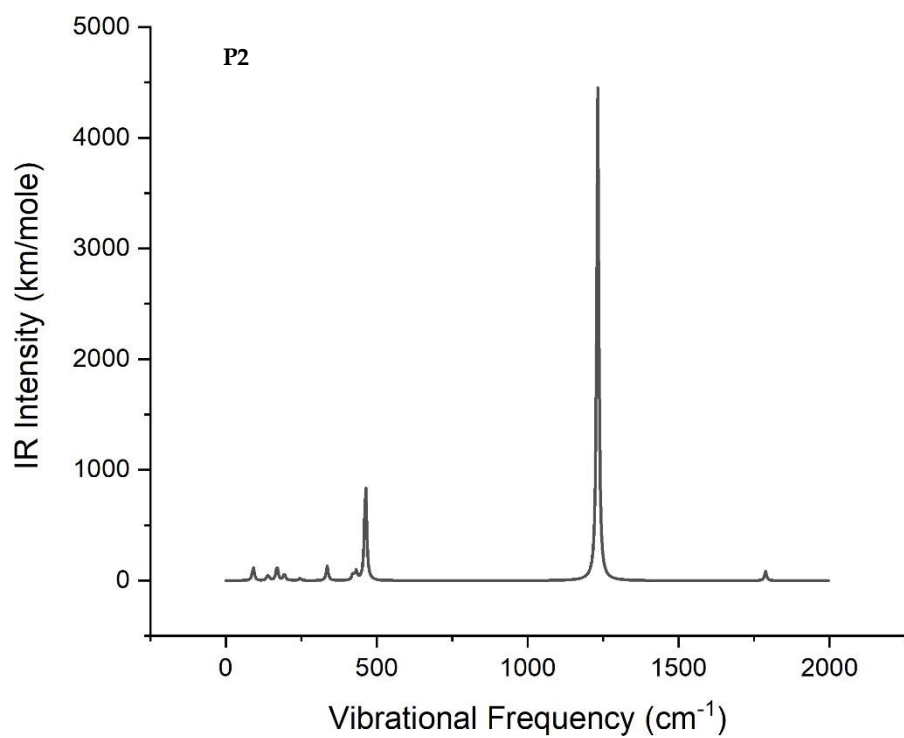

**Figure S5.** Density functional theory calculated infrared spectra of **IA1**, **IA2**, **P1** and **P2**.

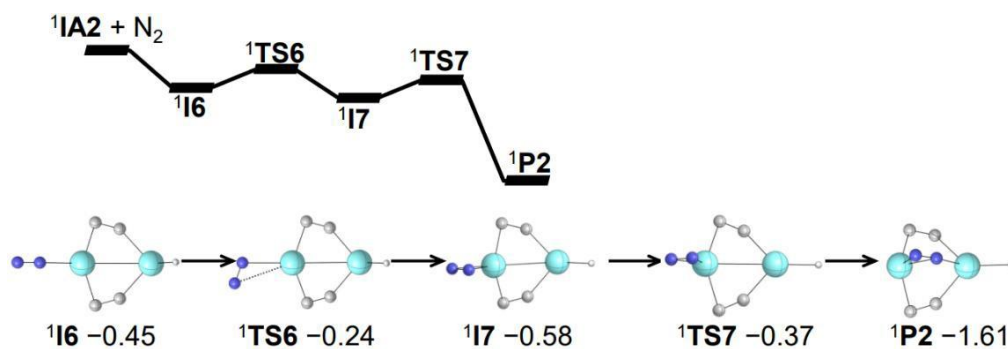

**Figure S6.** BPW91-D3-calculated potential energy surface for the reaction of  $\text{Y}_2\text{C}_4\text{H}^-$  with  $\text{N}_2$ . The zero-point vibration-corrected energies ( $\Delta H_{0K}$  in eV) of the reaction intermediates, transition states, and products with respect to the separated reactants are given. The superscripts indicate the spin multiplicities.

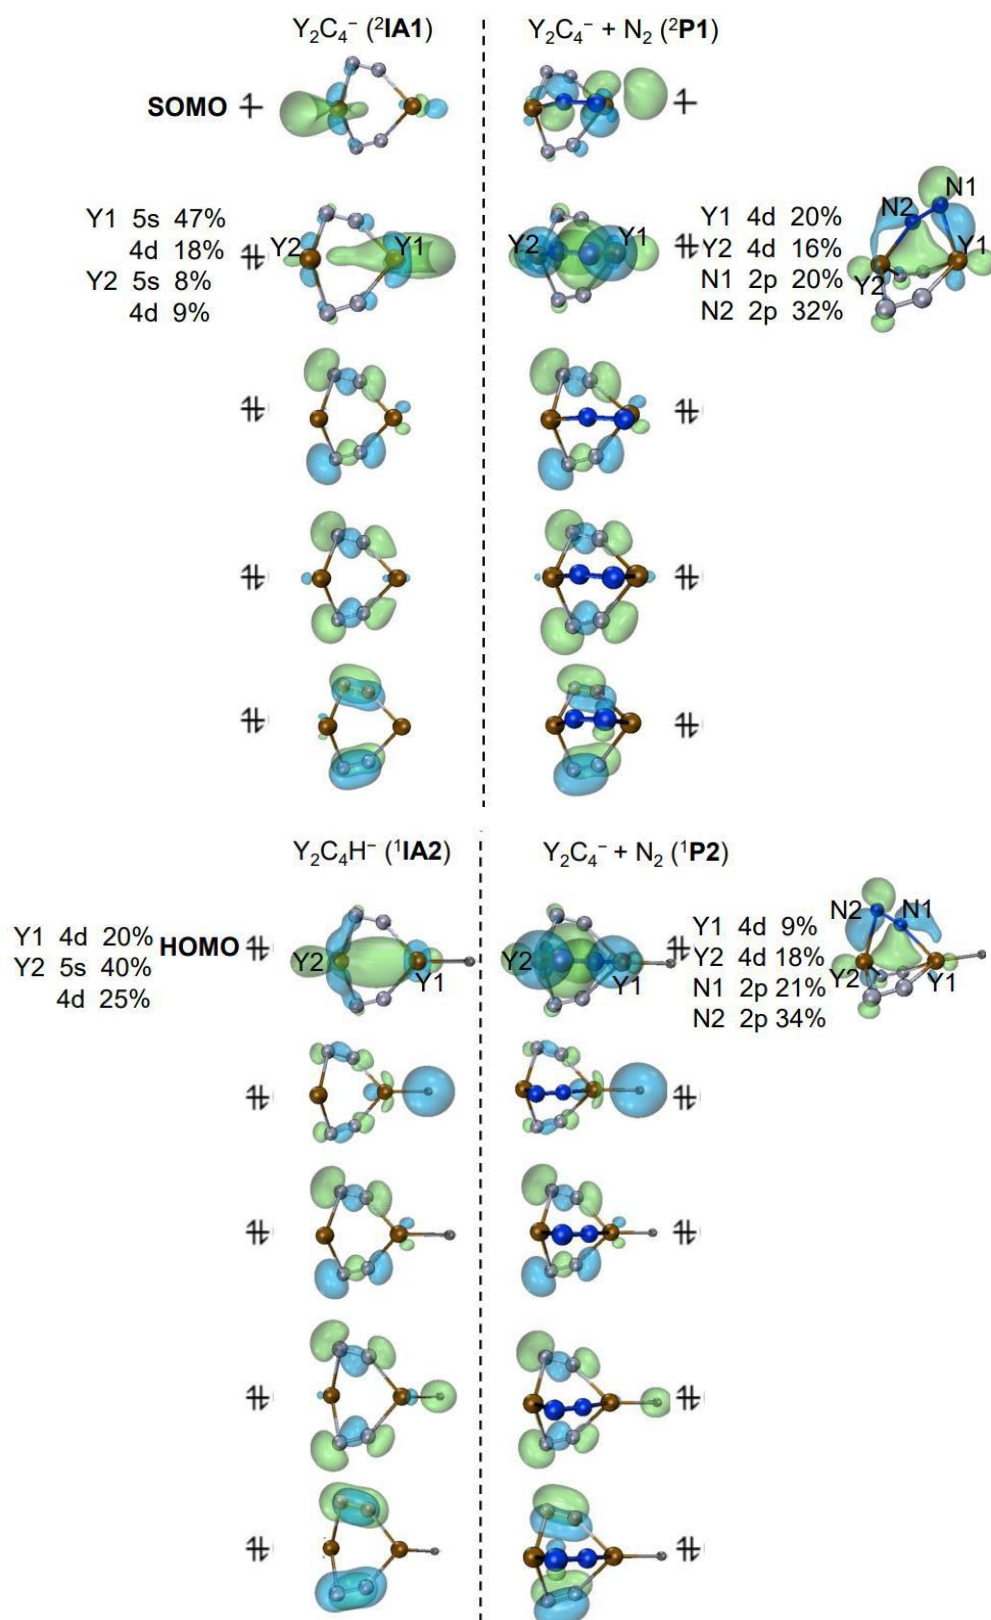

**Figure S7.** Schematic molecular orbital diagrams for (a) the Y<sub>2</sub>C<sub>4</sub><sup>-</sup> (<sup>2</sup>P1) and (b) Y<sub>2</sub>C<sub>4</sub>H<sup>-</sup> (<sup>1</sup>P2) in the pathways shown in Figure 2, respectively

**Table S2.** Charge details about the species in reaction pathway are given.

| structure | <sup>2</sup> IA1 | <sup>2</sup> I1 | <sup>2</sup> TS1 | <sup>2</sup> I2 | <sup>2</sup> TS2 | <sup>2</sup> P1 |
|-----------|------------------|-----------------|------------------|-----------------|------------------|-----------------|
| C1        | -0.53850         | -0.55204        | -0.53423         | -0.56114        | -0.57873         | -0.55014        |
| C2        | -0.81981         | -0.77152        | -0.80839         | -0.80420        | -0.76200         | -0.74067        |
| C3        | -0.81981         | -0.77152        | -0.80839         | -0.80412        | -0.75927         | -0.73551        |
| C4        | -0.53850         | -0.55204        | -0.53423         | -0.56102        | -0.57613         | -0.56829        |
| Y1        | 0.78572          | 1.14426         | 1.30755          | 1.52441         | 1.11711          | 1.16300         |
| Y2        | 0.93089          | 0.97876         | 0.91770          | 0.94891         | 1.22379          | 1.43432         |
| N1        |                  | -0.36811        | -0.39057         | -0.36486        | -0.31526         | -0.56119        |
| N2        |                  | -0.10779        | -0.14944         | -0.37797        | -0.34951         | -0.44153        |

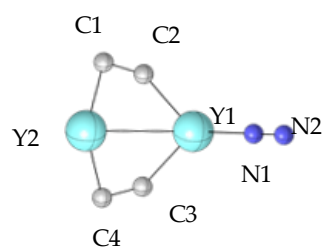

| structure | <sup>1</sup> IA2 | <sup>1</sup> I4 | <sup>1</sup> TS4 | <sup>1</sup> P2 |
|-----------|------------------|-----------------|------------------|-----------------|
| C1        | -0.54547         | -0.55496        | -0.56108         | -0.54738        |
| C2        | -0.78534         | -0.74573        | -0.74534         | -0.73381        |
| C3        | -0.54547         | -0.55496        | -0.56108         | -0.54738        |
| C4        | -0.78534         | -0.74573        | -0.74534         | -0.73381        |
| H         | -0.61720         | -0.60910        | -0.61434         | -0.63527        |
| Y1        | 1.47701          | 1.49931         | 1.49066          | 1.56622         |
| Y2        | 0.80183          | 1.11106         | 1.18165          | 1.49724         |
| N1        |                  | -0.29377        | -0.31855         | -0.48671        |
| N2        |                  | -0.10613        | -0.12658         | -0.37911        |

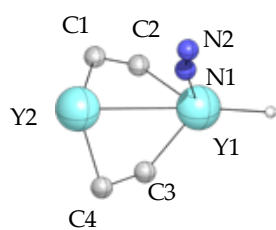

**Table S3.** DFT-calculated and experimental bond dissociation energies. Energies in eV are given.

| <div>Methods</div> <div>EXP.</div> |         | Y-C    | C-C   | Y-N    | N≡N    | A.D. <sup>1</sup> |
|------------------------------------|---------|--------|-------|--------|--------|-------------------|
|                                    |         | 4.332  | 6.37  | 4.944  | 9.79   |                   |
|                                    |         | ±0.653 | ±0.12 | ±0.653 | ±0.001 |                   |
| References                         |         | 52     | 53    | 54     | 55     |                   |
| Hybrid<br>Functionals              | B1B95   | 3.08   | 6.01  | 3.88   | 9.44   | 0.76              |
|                                    | B1LYP   | 3.08   | 5.77  | 3.56   | 9.33   | 0.92              |
|                                    | B3LYP   | 3.30   | 5.98  | 3.87   | 9.60   | 0.67              |
|                                    | B3P86   | 3.68   | 6.24  | 4.25   | 9.78   | 0.37              |
|                                    | B3PW91  | 3.61   | 6.08  | 4.02   | 9.43   | 0.58              |
|                                    | M05     | 3.15   | 6.11  | 4.10   | 9.36   | 0.68              |
|                                    | M052X   | 2.85   | 5.82  | 3.43   | 9.46   | 0.97              |
|                                    | PBE1PBE | 3.60   | 6.10  | 3.91   | 9.42   | 0.60              |
|                                    | X3LYP   | 3.28   | 5.97  | 3.80   | 9.58   | 0.70              |
|                                    | M06     | 3.10   | 6.04  | 3.98   | 9.27   | 0.76              |
|                                    | M062X   | 2.10   | 5.91  | 3.36   | 9.44   | 1.16              |
|                                    | BH&HLYP | 2.83   | 5.23  | 2.78   | 8.63   | 1.49              |
|                                    | BMK     | 3.05   | 5.77  | 3.38   | 9.49   | 0.94              |
| Pure<br>Functionals                | BPW91   | 3.88   | 6.50  | 4.66   | 9.95   | 0.26              |
|                                    | BLYP    | 3.50   | 6.35  | 4.46   | 10.09  | 0.41              |
|                                    | BP86    | 3.87   | 6.61  | 4.76   | 10.25  | 0.34              |
|                                    | BPBE    | 3.90   | 6.55  | 4.68   | 9.95   | 0.26              |
|                                    | M06L    | 3.87   | 6.34  | 4.44   | 9.41   | 0.35              |
|                                    | PBE     | 3.95   | 6.72  | 4.77   | 10.24  | 0.34              |
|                                    | TPSS    | 3.76   | 6.20  | 4.44   | 9.53   | 0.38              |

$$A. D. = \frac{\sum_i (x_i - x_{\text{exp}})}{4}, x_i \text{ is the DFT calculated bond dissociation energy and } x_{\text{exp}} \text{ is the experimental value.}$$

The Cartesian coordinates of all structures on display (M is denoted as spin state)

| Coordinate (Å) <sup>2</sup> IA1 |             |             |             |
|---------------------------------|-------------|-------------|-------------|
| C                               | 0.44963800  | 0.24866100  | 1.70426000  |
| C                               | 0.44963800  | -0.98023100 | -2.05139700 |
| C                               | 0.44963800  | 0.24866100  | -1.70426000 |
| C                               | 0.44963800  | -0.98023100 | 2.05139700  |
| Y                               | 0.12473300  | 1.76076400  | 0.00000000  |
| Y                               | -0.40143300 | -1.53566500 | 0.00000000  |

| Coordinate (Å) <sup>2</sup> I1 |             |             |             |
|--------------------------------|-------------|-------------|-------------|
| C                              | 0.73615600  | -0.22583700 | 1.71007700  |
| C                              | 0.73615600  | -1.45278800 | -2.05668500 |
| C                              | 0.73615600  | -0.22583700 | -1.71007700 |
| C                              | 0.73615600  | -1.45278800 | 2.05668500  |
| Y                              | 0.28696100  | 1.28355800  | 0.00000000  |
| Y                              | -0.12105200 | -1.99255300 | 0.00000000  |
| N                              | -1.33006000 | 2.99250500  | 0.00000000  |
| N                              | -2.11825300 | 3.83525600  | 0.00000000  |

| Coordinate (Å) <sup>2</sup> I2 |             |             |             |
|--------------------------------|-------------|-------------|-------------|
| C                              | 0.43698000  | -0.29009300 | 1.70004100  |
| C                              | 0.43698000  | -1.51736700 | -2.05091800 |
| C                              | 0.43698000  | -0.29009300 | -1.70004100 |
| C                              | 0.43698000  | -1.51736700 | 2.05091800  |
| Y                              | 0.26863800  | 1.29646000  | 0.00000000  |
| Y                              | -0.45022400 | -2.01269400 | 0.00000000  |
| N                              | -0.82706100 | 3.42221700  | 0.00000000  |
| N                              | 0.34053500  | 3.66673300  | 0.00000000  |

| Coordinate (Å) <sup>2</sup> P1 |             |             |             |
|--------------------------------|-------------|-------------|-------------|
| C                              | 0.07040900  | -1.32989900 | -1.35934900 |
| C                              | -1.27447600 | 2.16980000  | -0.29842500 |
| C                              | -0.04525700 | 1.83632000  | -0.36487400 |
| C                              | -1.16654300 | -1.63352000 | -1.45159800 |
| Y                              | 1.58946000  | 0.14608300  | -0.30012000 |
| Y                              | -1.50868200 | -0.08595000 | 0.23166400  |
| N                              | 0.22688900  | -0.50134700 | 1.53123300  |
| N                              | 1.39381000  | -0.72742900 | 1.82808700  |

| Coordinate (Å) <sup>1</sup> IA2 |             |             |            |
|---------------------------------|-------------|-------------|------------|
| C                               | -0.52011100 | -1.01388400 | 2.03408200 |
| C                               | -0.52011100 | 0.22236500  | 1.72472500 |

|   |             |             |             |
|---|-------------|-------------|-------------|
| C | -0.52011100 | -1.01388400 | -2.03408200 |
| C | -0.52011100 | 0.22236500  | -1.72472500 |
| H | 0.71531100  | 3.65186500  | 0.00000000  |
| Y | 0.37518900  | -1.56489300 | 0.00000000  |
| Y | -0.07346200 | 1.71479900  | 0.00000000  |

Coordinate (Å) **<sup>1</sup>I4**

|   |             |             |             |
|---|-------------|-------------|-------------|
| C | 0.81969400  | 1.26130100  | 2.03097100  |
| C | 0.81969400  | 0.04135800  | 1.65912800  |
| C | 0.81969400  | 1.26130100  | -2.03097100 |
| C | 0.81969400  | 0.04135800  | -1.65912800 |
| H | 1.05478100  | -3.56562300 | 0.00000000  |
| Y | -0.06551500 | 1.76515900  | 0.00000000  |
| Y | 0.43284300  | -1.57209900 | 0.00000000  |
| N | -1.93439500 | -1.33683900 | 0.00000000  |
| N | -3.07320800 | -1.46253600 | 0.00000000  |

Coordinate (Å) **<sup>1</sup>P2**

|   |             |             |             |
|---|-------------|-------------|-------------|
| C | -0.88696700 | -1.16421700 | 1.98863400  |
| C | -0.88696700 | 0.06868300  | 1.66557900  |
| C | -0.88696700 | -1.16421700 | -1.98863400 |
| C | -0.88696700 | 0.06868300  | -1.66557900 |
| H | -0.61728800 | 3.78493400  | 0.00000000  |
| Y | 0.28646200  | -1.47093800 | 0.00000000  |
| Y | -0.42634700 | 1.68343200  | 0.00000000  |
| N | 1.52500300  | 0.50182600  | 0.00000000  |
| N | 2.38357200  | -0.34836800 | 0.00000000  |

Coordinate (Å) **<sup>1</sup>I7**

|   |             |             |             |
|---|-------------|-------------|-------------|
| C | -0.30436600 | 2.00451500  | -0.95061600 |
| C | 0.74407800  | 1.69622100  | -0.28789900 |
| C | -0.30393000 | -2.00473800 | -0.95061400 |
| C | 0.74414900  | -1.69612600 | -0.28746300 |
| H | 3.20578300  | 0.00021300  | 2.01245800  |
| Y | -1.20933700 | -0.00009300 | -0.12285000 |
| Y | 2.21175000  | 0.00006400  | 0.20699000  |
| N | -3.59138200 | 0.00001700  | 0.12465000  |
| N | -3.20568800 | 0.00022400  | 1.24186800  |



## References

33. Steinfeld, J.I.; Francisco, J.S.; Hase, W.L. *Chemical Kinetics and Dynamics*; Prentice-Hall: Hoboken, NJ, USA, 1999; p. 231.
51. Beyer, T.; Swinehart, D.F. Algorithm 448: Number of Multiply-Restricted Partitions. *Commun. ACM* **1973**, *16*, 379.
52. Simoes, J.A.M.; Beauchamp, J. L. Transition metal-hydrogen and metal-carbon bond strengths: The keys to catalysis. *Chem. Rev.* **1990**, *90*, 629–688.
53. NIST Chemistry Webbook; Mallard, W.G., Ed.; August 1996. Available online: <http://webbook.nist.gov> (accessed on 20 January 2022).
54. Gurvich, L.V.; Karachevtsev, G.V. *Bond Energies of Chemical Bonds, Ionization Potentials and Electron Affinities*; Nauka: Moscow, Russia, 1974.
55. Tang, X.N.; Hou, Y.; Ng, C.Y.; Ruscic, B. Pulsed field-ionization photoelectronphotoion coincidence study of the process  $\text{N}_2 + h\nu \rightarrow \text{N}^+ + \text{N} + \text{e}^-$ : Bond dissociation energies of  $\text{N}_2$  and  $\text{N}_2^+$ . *J. Chem. Phys.* **2011**, *123*, 074330.
